# Supplementary material
Source: Springer Nature journal article supplement (https://www.springermedizin.de/resource/supplementary/12936_2010_1277_MOESM2_ESM.pdf/9549388)

Kisumu

Lyanaginga

Fort Ternan

Small-sized pools

Medium-sized pools

Large-sized pools

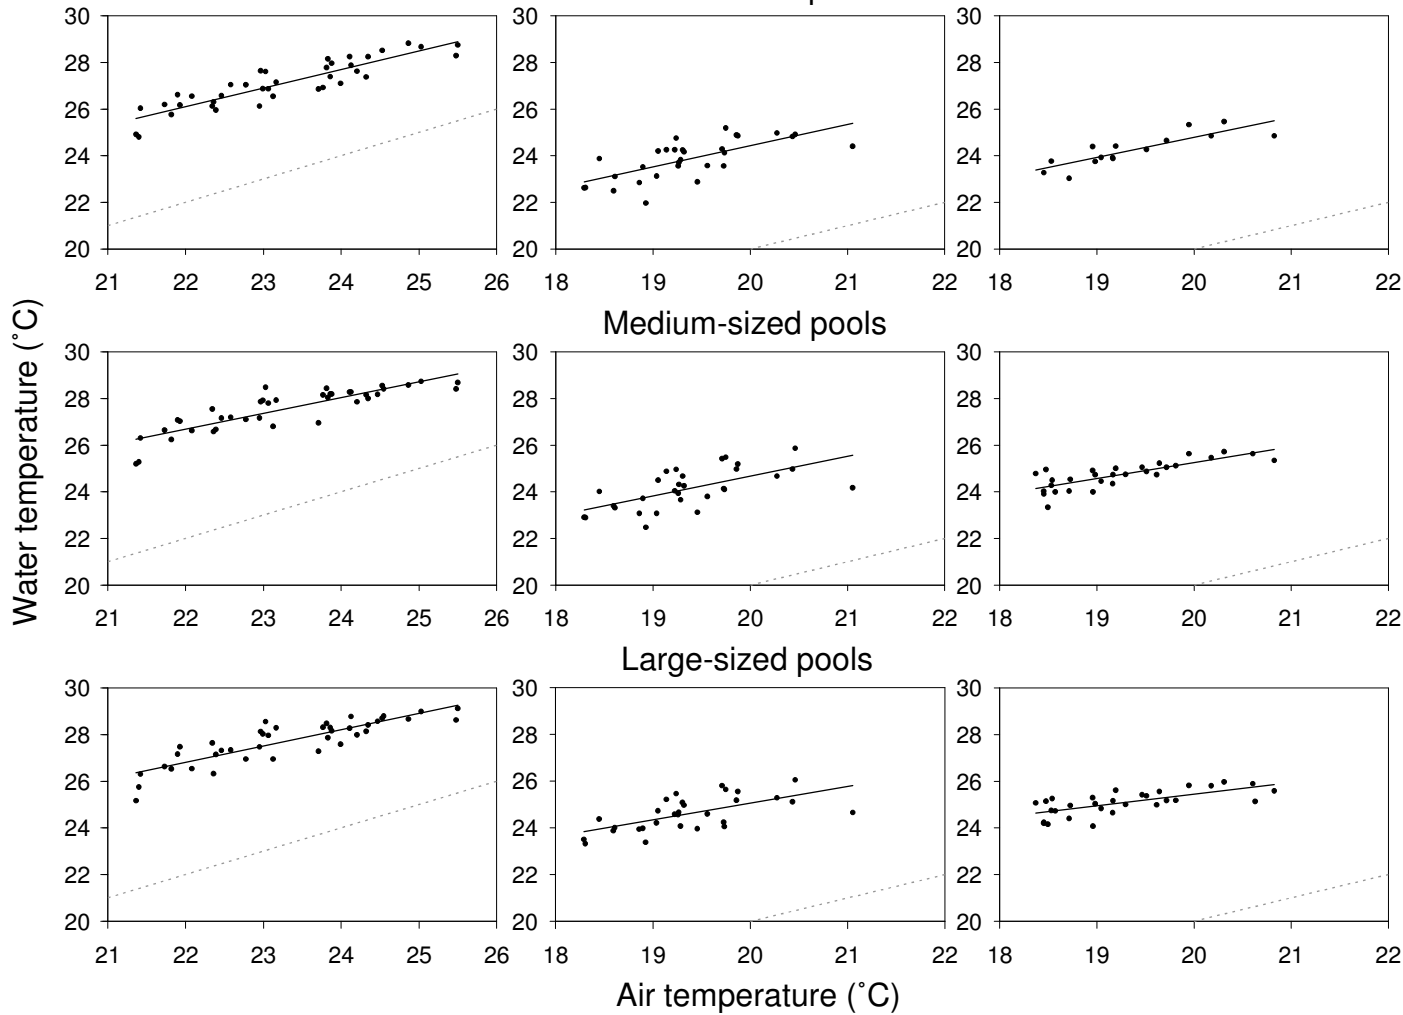

Supplement: MOESM2 [file 9549388]
